# Supplementary material for: Lrp5/6 are required for cerebellar development and for suppressing TH expression in Purkinje cells via β-catenin
Source: PubMed Central journal article supplement (PMC4714458; doi:10.1186/s13041-015-0183-1), 2016-01-15

## Supplementary figure legends

**Supplementary Figure 1 The earliest stage of defective cerebellar morphology in *Lrp5/6* dCKO mice.** (a-d) Nissl staining showing that failure of cerebellar foliation is not evident in the dCKO mice at P0 (b) but is observed at P3 (d) compared to control mice (a, c). (e-h) Pax6 expression in control and *Lrp5/6* dCKO mice at P0 (e, g) and P3 (f, h). EGL, external granule layer. Scale bars, 500  $\mu$ m in (d) and applies to (a-c), and 25  $\mu$ m in (h) and applies to (e-g).

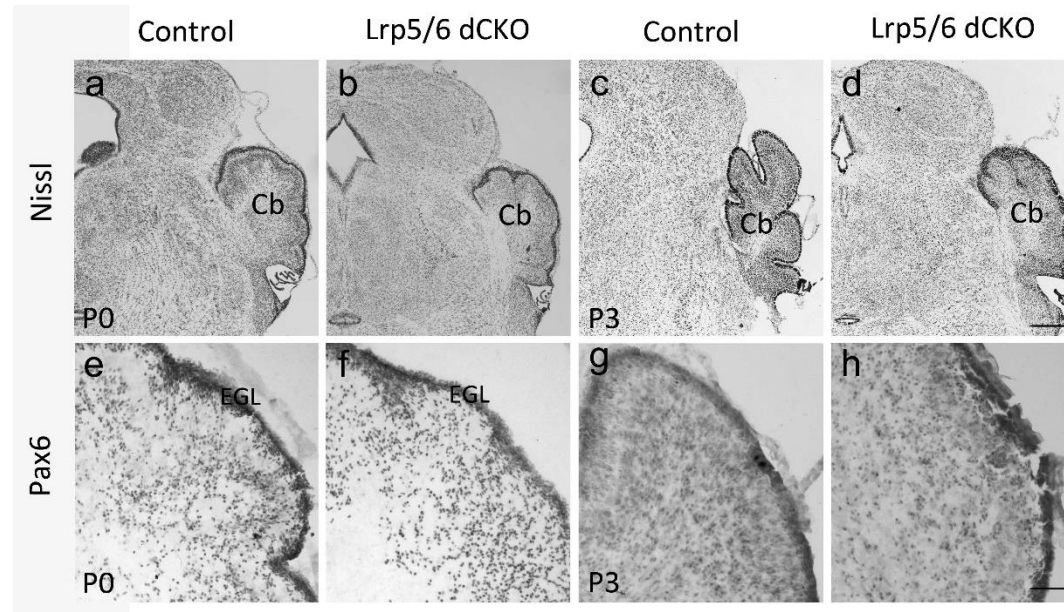

Supplement: 13041_2015_183_MOESM1_ESM.pdf [file 13041_2015_183_MOESM1_ESM.pdf]
